# Supplementary material
Source: PubMed Central journal article supplement (PMC6583759)
Supplement: jama-319-1870-s002.pdf [file jama-319-1870-s002.pdf]

1

## 2 **Supplementary Online Content**

3 Clark WF, Sontrop JM, Huang S et al. Effect of coaching to increase water intake on kidney function  
4 decline in adults with chronic kidney disease: A Randomized clinical trial

5

## 6 **Final Statistical Analysis for the Chronic Kidney Disease Water Intake Trial**

7 **Primary analysis:** Continuous variables are summarized as means and standard deviations (SD) or as  
8 medians and inter-quartile ranges as appropriate. No statistical tests were used to compare baseline  
9 characteristics.<sup>1</sup> Linear regression was used to estimate the between-group difference in eGFR change  
10 (hydration minus control) using SAS version 9.3 (SAS Institute Inc., Cary, NC). The following pre-specified  
11 covariates<sup>2</sup> (measured at baseline) were adjusted for in the primary analysis: age (in years), sex, obesity  
12 (body mass index  $\geq 30$  kg/m<sup>2</sup>), current smoker (yes/no), presence of diabetes, 24-hour urine albumin  
13 (mg/day) (log transformed), and use of any of the following medications: an angiotensin-converting  
14 enzyme inhibitor or angiotensin receptor blocker, diuretic, beta blocker, calcium channel blocker, or  
15 statin.<sup>3</sup> Missing baseline data occurred for <0.2% of categorical covariates (if missing, the condition was  
16 considered absent) and 6% for 24-hour urine albumin (imputed using fully conditionally specified  
17 models<sup>4</sup> as described below). Participants who died within one year of follow-up were excluded from  
18 the primary and secondary outcome analyses (12 of 631 participants [1.9%]). Less than 5% of survivors  
19 were missing a 12-month eGFR value ( $\pm 4$  months); missing eGFR data was imputed using fully  
20 conditionally specified models<sup>4</sup> as detailed below. SAS PROC MIANALYZE was used to combine results  
21 from imputed datasets.<sup>5</sup> The type I error rate was set at 0.05. All analyses were conducted according to  
22 the intention-to-treat principle.

23 **Analysis of missing data:** Missing baseline data occurred for <0.2% of categorical covariates (if missing,  
24 the condition was considered absent) and 6% for 24-hour urine albumin (imputed using fully  
25 conditionally specified models<sup>4</sup> as described below). Participants who died within one year of follow-up  
26 were excluded from the primary and secondary outcome analyses (12 of 631 participants [1.9%]). Less  
27 than 5% of survivors were missing a 12-month post-randomization eGFR ( $\pm 4$  months); missing eGFR data  
28 was imputed using fully conditionally specified models<sup>4</sup> with the following baseline variables: treatment  
29 group, center, age (in years), sex, presence of obesity (Body Mass Index  $\geq 30$  kg/m<sup>2</sup>), current smoker  
30 (yes/no), presence of diabetes, 24-hour urine albumin (mg/day) (log transformed), and use of any of the

31 following medications: an angiotensin-converting enzyme inhibitor or angiotensin receptor blocker,  
32 diuretic, beta blocker, calcium channel blocker, and statin (yes/no). Estimated GFR values at the 3-  
33 month and 6-month study time points were also included in the imputation. Twenty datasets were  
34 imputed. We assumed that data were missing at random, and that the data were from a multivariate  
35 normal distribution. We conducted several sensitivity analyses to examine whether conclusions were  
36 sensitive to assumptions about the missing-data mechanism; these analyses included a complete-case  
37 unadjusted analysis, simple imputation, and imputation that did not include the treatment group.<sup>6,7</sup> SAS  
38 PROC MIANALYZE was used to combine results from imputed datasets.<sup>5</sup> The type I error rate was set at  
39 0.05.

40 **Supporting analyses:** Several supplementary analyses were conducted using alternative definitions of  
41 change in eGFR. As specified in the protocol,<sup>2</sup> for these analyses, a p-value <0.05 would be interpreted  
42 as statistically significant only if there was concordance with the primary results. Supplementary  
43 analyses included the between-group difference in (i) eGFR measured with cystatin C (ii) the annual  
44 percentage change defined as [(final eGFR-baseline eGFR)/baseline eGFR] and (iii) the proportion of  
45 participants with a one-year eGFR decline  $\geq 20\%$ .<sup>8-10</sup> We also examined whether results were consistent  
46 in participants with and without macroalbuminuria at baseline (24-hour urine albumin  $\geq 300$  mg/day).  
47 Finally, we conducted a per-protocol analysis restricted to participants in the hydration group who  
48 maintained a 24-hour urine volume that was at least 0.5 L/day above their baseline value at 6-months  
49 and 12-months after randomization, and participants in the control group who maintained a 24-hour  
50 urine volume that was  $< 0.5$  L/day above their baseline value at each follow-up assessment; participants  
51 who missed an assessment or whose final urine sample was collected  $> 16$  months after randomization  
52 were excluded.

53 *Longitudinal rate of change in eGFR (sensitivity analysis of primary outcome):* We conducted a  
54 longitudinal analysis of eGFR, estimating the average change in eGFR for each 1-month increase in time,  
55 for both groups. To do this, we used a mixed-effects model with a random intercept. The outcome was  
56 eGFR measured at one of four time points. The fixed-effects regression coefficients were time (0, 3, 6,  
57 and 12 months), and a time-treatment group interaction term. The time coefficient describes the  
58 average change in eGFR for a one-month increase in time for participants who were randomized to the  
59 hydration group. The time-treatment group interaction term represents the additional change in eGFR  
60 for the control group (i.e. the sum of the two coefficients represents the average change in eGFR for a  
61 one-month increase in time for participants randomized to the control group). The random intercept

62 was used to account for within-subject correlation. For this analysis, 3- month eGFR was defined as the  
63 eGFR measured closest to 3 months (between 1.5 and 4.5 months after randomization), 6-month eGFR  
64 was defined as the eGFR measured closest to 6 months (between 4.5 and 8 months after  
65 randomization), and 12-month eGFR was defined as the eGFR measured closest to 12 months (between  
66 8 and 16 months after randomization). We tested whether the coefficient for the time-treatment group  
67 interaction term was equal to zero, which would indicate that the change in eGFR over time was equal  
68 between the groups. If this term was significantly different from zero, we reported the average change  
69 in eGFR for a one-month increase in time for both groups separately. If the time-treatment interaction  
70 coefficient was not significantly different from zero at the  $\alpha=0.05$  level, we fit the same mixed-effects  
71 regression model, but omitted the interaction term. From this model, we tested the null hypothesis that  
72 the average change in eGFR was equal to zero at the  $\alpha=0.05$  level, for both treatment groups  
73 simultaneously.

74 ***Analyses of secondary outcomes:*** The one-year changes in plasma copeptin concentration, creatinine  
75 clearance, 24-hour urine albumin, and health-related quality of life were compared between groups  
76 using the independent-samples t-test or the Mann-Whitney U as appropriate.

77

78 **References**

- 79 1. Moher D, Hopewell S, Schulz KF, et al. CONSORT 2010 explanation and elaboration: updated  
80 guidelines for reporting parallel group randomised trials. *BMJ*. 2010;340:c869.
- 81 2. Clark WF, Huang S-HS, Garg AX, et al. The Chronic Kidney Disease Water Intake Trial (WIT):  
82 Protocol of a Randomized Controlled Trial. *Can J Kidney Heal Dis*. 2017;4(Aug  
83 22):2054358117725106.
- 84 3. Roy J, Shou H, Xie D, et al. Statistical Methods for Cohort Studies of CKD: Prediction Modeling.  
85 *Clin J Am Soc Nephrol*. 2017;12(6):1010-1017.
- 86 4. Van Buuren S, Brand JPL, Groothuis-Oudshoorn CGM, Rubin DB. Fully conditional specification in  
87 multivariate imputation. *J Stat Comput Simul*. 2006;76(12):1049-1064.
- 88 5. SAS Institute Inc. The MIANALYZE Procedure. *SAS/STAT® 92 User's Guid Second Ed Cary, NC, USA*.  
89 2009:3839.  
90 [https://support.sas.com/documentation/cdl/en/statug/63033/HTML/default/viewer.htm#mianal  
92 yze\\_toc.htm](https://support.sas.com/documentation/cdl/en/statug/63033/HTML/default/viewer.htm#mianal<br/>91 yze_toc.htm). Accessed June 20, 2017.
- 92 6. Little RJ, D'Agostino R, Cohen ML, et al. The Prevention and Treatment of Missing Data in Clinical  
93 Trials. *N Engl J Med*. 2012;367(14):1355-1360. doi:10.1056/NEJMSr1203730.
- 94 7. Carpenter JR, Kenward MG. Missing data in randomised controlled trials — a practical guide.  
95 2007. <https://pdfs.semanticscholar.org/e9c4/6359114e7eb6fd17d3ff93fec7ce54479ef5.pdf>.  
96 Accessed February 7, 2017.
- 97 8. Perkins RM, Bucaloiu ID, Kirchner HL, Ashouian N, Hartle JE, Yahya T. GFR Decline and Mortality  
98 Risk among Patients with Chronic Kidney Disease. *Clin J Am Soc Nephrol*. June 2011.
- 99 9. Kovesdy CP, Coresh J, Ballew SH, et al. Past Decline Versus Current eGFR and Subsequent ESRD  
100 Risk. *J Am Soc Nephrol*. 2016;27(8):2447-2455.
- 101 10. Naimark DMJ, Grams ME, Matsushita K, et al. Past Decline Versus Current eGFR and Subsequent  
102 Mortality Risk. *J Am Soc Nephrol*. 2016;27(8):2456-2466.

103
